# Supplementary material
Source: PubMed Central journal article supplement (PMC4441261)
Supplement: NIHMS682072-supplement-Supplementary_data.pdf [file NIHMS682072-supplement-Supplementary_data.pdf]

## Supplementary Online Content

Siddiqui M, Roberts ET, Pollack CE. The effect of emergency department copayments for Medicaid beneficiaries following the Deficit Reduction Act of 2005. *JAMA Intern Med*. Published online January 26, 2015. doi:10.1001/jamainternmed.2014.7582.

**eTable.** Medicaid Policies in Copayment and Control States

This supplementary material has been provided by the authors to give readers additional information about their work.

© 2015 American Medical Association. All rights reserved.

**eTable. Medicaid Policies in Copayment and Control States**

| States                           | Copayment amount (\$) | Medicaid Managed Care Enrollment (%) <sup>†</sup> | Primary Care Case Management Enrollment (%)** <sup>†</sup> | Medicaid Patient Centered Medical Home <sup>¥</sup> | Per Capita Primary Care Physicians <sup>€</sup> |
|----------------------------------|-----------------------|---------------------------------------------------|------------------------------------------------------------|-----------------------------------------------------|-------------------------------------------------|
| <b>STATES with COPAYMENTS</b>    |                       |                                                   |                                                            |                                                     |                                                 |
| Florida                          | 5% (\$15 cap)*        | 64.5                                              | 31.6                                                       | Yes                                                 | 44.3                                            |
| Kentucky                         | 5% (\$6 cap)*         | 88.2                                              | 44.0                                                       | Yes                                                 | 43.5                                            |
| Minnesota                        | 6                     | 63.8                                              | 0.0                                                        | Yes                                                 | 56.8                                            |
| Montana                          | 5                     | 74.6                                              | 99.9                                                       | Yes                                                 | 41.6                                            |
| Ohio                             | 3                     | 73.5                                              | 0.0                                                        | Yes                                                 | 50.4                                            |
| Pennsylvania                     | 3                     | 81.7                                              | 17.5                                                       | Yes                                                 | 49.7                                            |
| South Carolina                   | 3                     | 100                                               | 13.8                                                       | Yes                                                 | 36.3                                            |
| Washington                       | 3                     | 86.7                                              | 0.6                                                        | Yes                                                 | 59.6                                            |
| <b>STATES without COPAYMENTS</b> |                       |                                                   |                                                            |                                                     |                                                 |
| California                       | 0                     | 55.1                                              | 0.0                                                        | Yes                                                 | 47.3                                            |
| Colorado                         | 0                     | 94.6                                              | 5.1                                                        | Yes                                                 | 51.4                                            |
| Connecticut                      | 0                     | 69.9                                              | 1.1                                                        | Yes                                                 | 53.8                                            |
| Georgia                          | 0                     | 91.0                                              | 9.1                                                        | No                                                  | 31.0                                            |
| Louisiana                        | 0                     | 63.7                                              | 99.9                                                       | Yes                                                 | 39.0                                            |
| Maryland                         | 0                     | 79.5                                              | 0.0                                                        | Yes                                                 | 50.3                                            |
| Michigan                         | 0                     | 86.2                                              | 0.0                                                        | Yes                                                 | 52.3                                            |
| North Carolina                   | 0                     | 77.5                                              | 98.3                                                       | Yes                                                 | 38.7                                            |
| Texas                            | 0                     | 67.0                                              | 33.7                                                       | Yes                                                 | 33.6                                            |
| Virginia                         | 0                     | 59.2                                              | 10.7                                                       | Yes                                                 | 44.5                                            |

\*As percent of total payment with cap on copayment amount

\*\*Of those enrolled in Medicaid Managed Care

<sup>†</sup>Data obtained from the 2011 Medicaid Managed Care Enrollment Report<sup>14</sup>

<sup>¥</sup>2013 Data from the National Academy for State Health Policy<sup>15</sup>

<sup>€</sup>2012 Data from the National Center for Health Statistics (per capita PCP remained stable from 2002-2012)<sup>16</sup>
